# Supplementary material
Source: publisher figshare collection journal article supplement (https://tandf.figshare.com/ndownloader/files/18057356)
Supplement: Supplementary file 1 [file 18057356]

Table SI. Sampling dates for sandhopper collection with corer and pitfall on sandy beaches with distinct impact levels.

| **CORER (Suciu et al. 2018)** | **PITFALL (Present study)** | **IMPACT LEVEL** | **TOURISM SEASON** |
| --- | --- | --- | --- |
| 12 June 2015 | 10 June 2017 | High | Low |
| 14 June 2015 | 11 June 2017 | Low | Low |
| 15 June 2015 | 23 July 2017 | Medium | Low |
| 16 August 2015 | 8 September 2017 | High | Low |
| 14 August 2015 | 7 September 2017 | Low | Low |
| 15 August 2015 | 8 October 2017 | Medium | Low |
| 25 February 2016 | 3 February 2018 | High | High |
| 23 February 2016 | 16 February 2018 | Low | High |
| 24 February 2016 | 17 February 2018 | Medium | High |
| 23 March 2016 | 4 March 2018 | High | High |
| 21 March 2016 | 16 March 2018 | Low | High |
| 22 March 2016 | 17 March 2018 | Medium | High |
